# Supplementary material for: Iron-mimic peptide converts transferrin from foe to friend for orally targeting insulin delivery
Source: Royal Society of Chemistry journal article supplement (doi:10.1039/c7tb02450a), 2017-12-18
Supplement: c7tb02450a1.pdf [file c7tb02450a1.pdf]

## Supplementary Materials

### SUPPLEMENTARY FIGURES

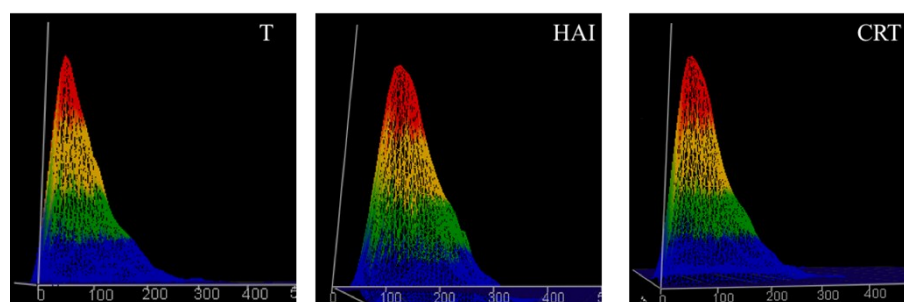

**Supplementary Figure S1.** Characterization of different NPs by a Nano Sight LM10 system.

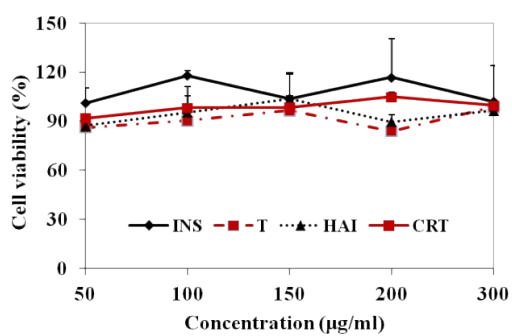

**Supplementary Figure S2.** Cytotoxicity of different formulations on Caco-2 cells at different concentration.

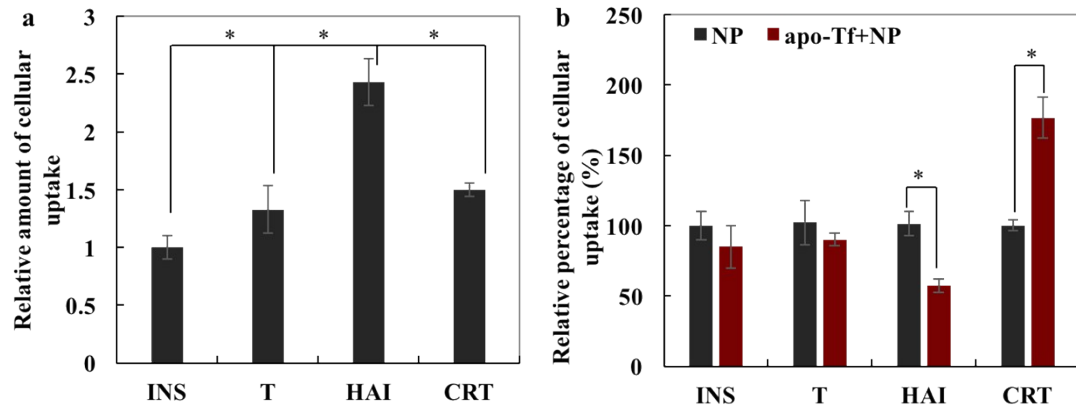

**Supplementary Figure S3.** Amounts of INS internalized by Caco-2 cells determined by flow cytometry (a) in the absence of apo-Tf (b) in the presence of apo-Tf.

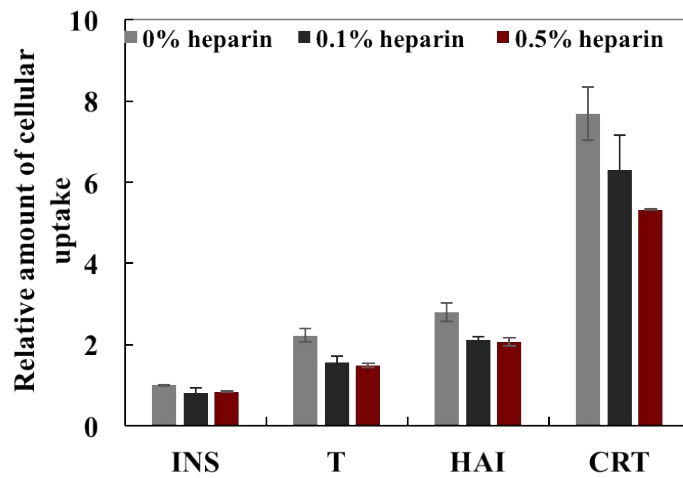

**Supplementary Figure S4.** Relative amount of cellular uptake after washing with heparin.

## SUPPLEMENTARY TABLES

Table S1. Characteristics of the NPs

| Samples | Size (nm)  | Zeta potential (mV) | Drug Loading % |
|---------|------------|---------------------|----------------|
| T       | 133.4±10.5 | 43.6±0.9            | 25.0±2.1       |
| HAI     | 177.6±2.7  | 26.3±01.5           | 20.4±1.8       |
| CRT     | 204.3±12.2 | 23.1±0.3            | 22.9±2.1       |
